# Supplementary material for: Autosomal genetic variation is associated with DNA methylation in regions variably escaping X-chromosome inactivation
Source: Springer Nature journal article supplement (doi:10.1038/s41467-018-05714-3), 2018-09-10
Supplement: MOESM14 [file 41467_2018_5714_MOESM14_ESM.pdf › 41467_2018_5714_MOESM14_ESM.pdf]

## **Descriptions of Supplementary Data files**

### *Supplementary Data 1*

Number of female and male samples per cohort used in the discovery phase.

### *Supplementary Data 2*

Characteristics of the four female-specific loci identified in the discovery cohort.

### *Supplementary Data 3*

The 48 sentinel variants corresponding to the 48 loci identified in female samples, and tested for an effect in males. For each variant, the table associated *P*-values for females and males, the number of associated CpGs, the nearest gene, and mean effect sizes over the associated CpGs.

### *Supplementary Data 4*

Test-statistics for the association of three sentinel variants with X-chromosomal DNA methylation, both uncorrected and corrected for nearby X-chromosomal genetic variants.

### *Supplementary Data 5*

All variants known to affect blood composition<sup>19,20</sup> and their associated *P*-values relating to the association with X-chromosomal DNA methylation. None of the variants reach statistical significance after correction for multiple testing, indicating these variants do not confound the analysis through blood composition.

### *Supplementary Data 6*

Re-testing the four female-specific sentinel variants corrected for nearby (1Mb) variants known to affect blood composition<sup>19,20</sup>, or without correcting for the latent factors.

### *Supplementary Data 7*

Results from the replication analysis of the four sentinel variants in independent cohorts.

### *Supplementary Data 8*

Results from *cis*-eQTL mapping, relating the sentinel variants of the three replicated, female-specific sentinel variants to nearby genes (<250Kb).

### *Supplementary Data 9*

Results from *trans*-meQTL mapping of the three sentinel variants on all individual X-chromosomal CpGs.

### *Supplementary Data 10*

X-chromosomal CpGs and the significant associations to nearby X-chromosomal genes (<250Kb).

### *Supplementary Data 11*

*Trans*-meQTL mapping of the three sentinel variants on all autosomal CpGs *in trans* (>5Mb).
